# Supplementary material for: Direct Recruitment of Insulin Receptor and ERK Signaling Cascade to Insulin-Inducible Gene Loci
Source: PubMed Central journal article supplement — Diabetes. 2010 Oct 7;60(1):127–37. doi: 10.2337/db09-1806 (PMC3012164; doi:10.2337/db09-1806), 2010-10-07
Supplement: supp_db09-1806_db091806onlineappendix.pdf [file supp_db09-1806_db091806onlineappendix.pdf]

## **ONLINE APPENDIX - Supplementary material**

### **Direct recruitment of insulin receptor and ERK signaling cascade to insulin-inducible gene loci**

Joel D. Nelson<sup>\*&</sup>, Renée C. LeBoeuf<sup>†&</sup>, and Karol Bomsztyk<sup>\*&</sup>

<sup>\*</sup>Molecular and Cellular Biology Program, <sup>&</sup>UW Medicine Lake Union, <sup>†</sup>Division of Metabolism, Endocrinology and Nutrition, Department of Medicine, University of Washington, University of Washington, Seattle, WA 98109, USA

**Supplementary Figure 1 – Insulin induced IR and kinase recruitment is specific to cells expressing IR.** Serum deprived rat hepatocyte cell line with (HTC-IR) or without (HTC) the human insulin receptor [1] was treated with insulin ( $10^{-8}$  M) for 5, 10, 20, 30, and 60 minutes or left untreated. **A.** Total cellular RNA from these cells was used in RT reactions with random hexamers. cDNAs were used in real-time PCR with primers to the last exon of *egr-1*, the human insulin receptor gene, or  $\beta$ -actin. **B.** Cells were treated as in A, cross-linked, and then used in ChIP with antibodies to Pol II, IR $\beta$ , pIR $\beta$ , pErk and H3K27m3. ChIPed DNA was used in PCR reactions with primers to -5.3 kb, +232 bp, and +8 kb with respect to the TSS of *egr-1*. A-B, Data represent the mean  $\pm$  SEM of two independent experiments.

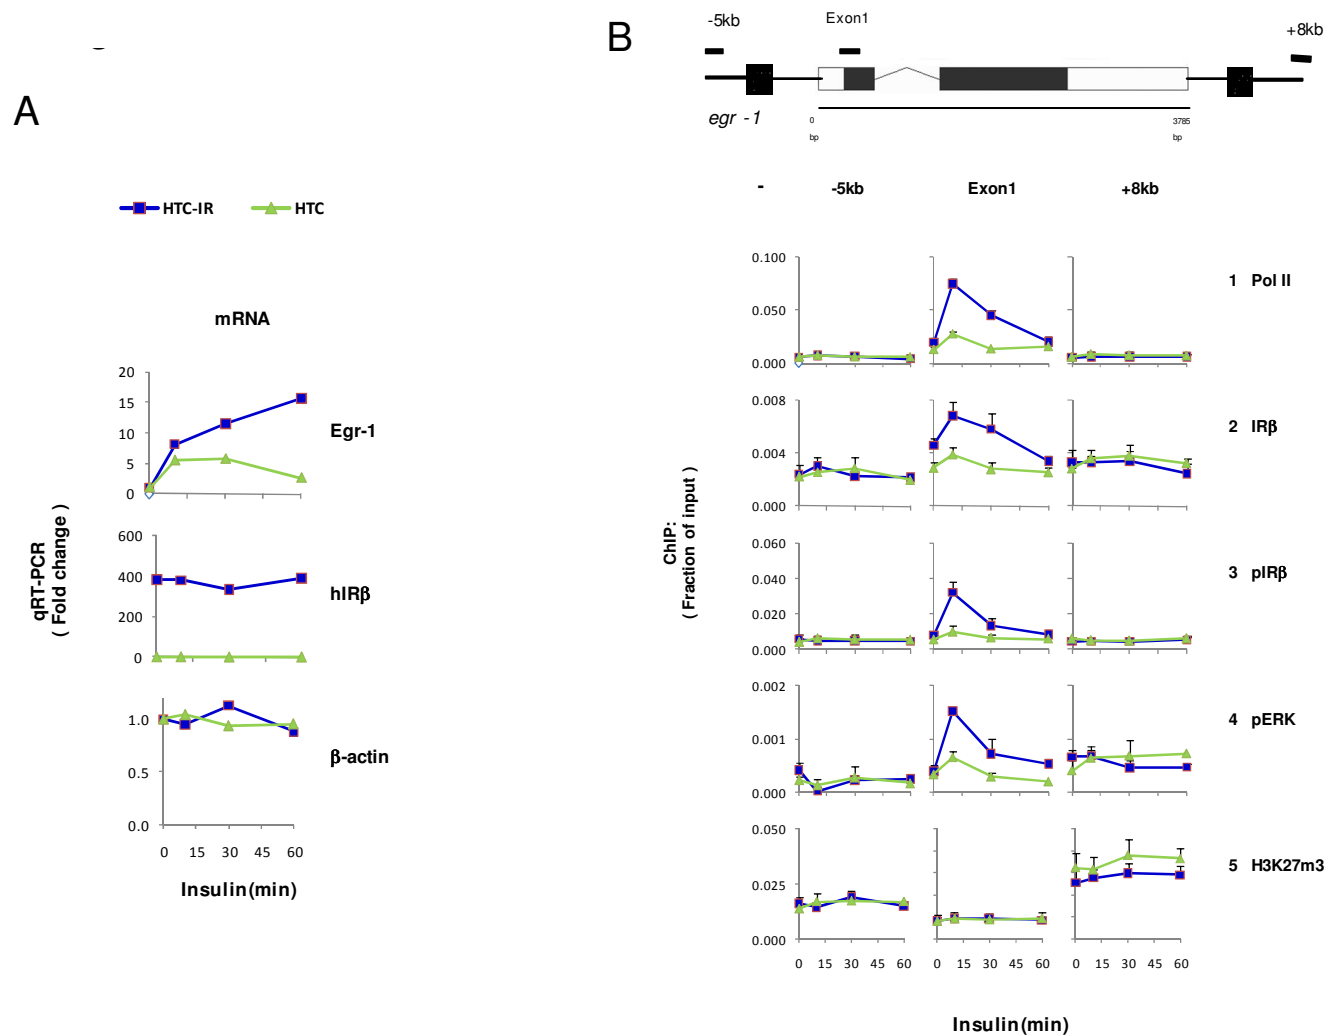

**Supplementary Figure 2 – Synchrony in the kinetics of Pol II recruitment and kinase activation at insulin- induced *egr1*.** ChIP data from Figs. 2C and 3C were plotted with total and phosphorylated kinases on the same axes at the +232 bp (Exon1 ) and +3.1 kb (Exon2) sites of *egr1*.

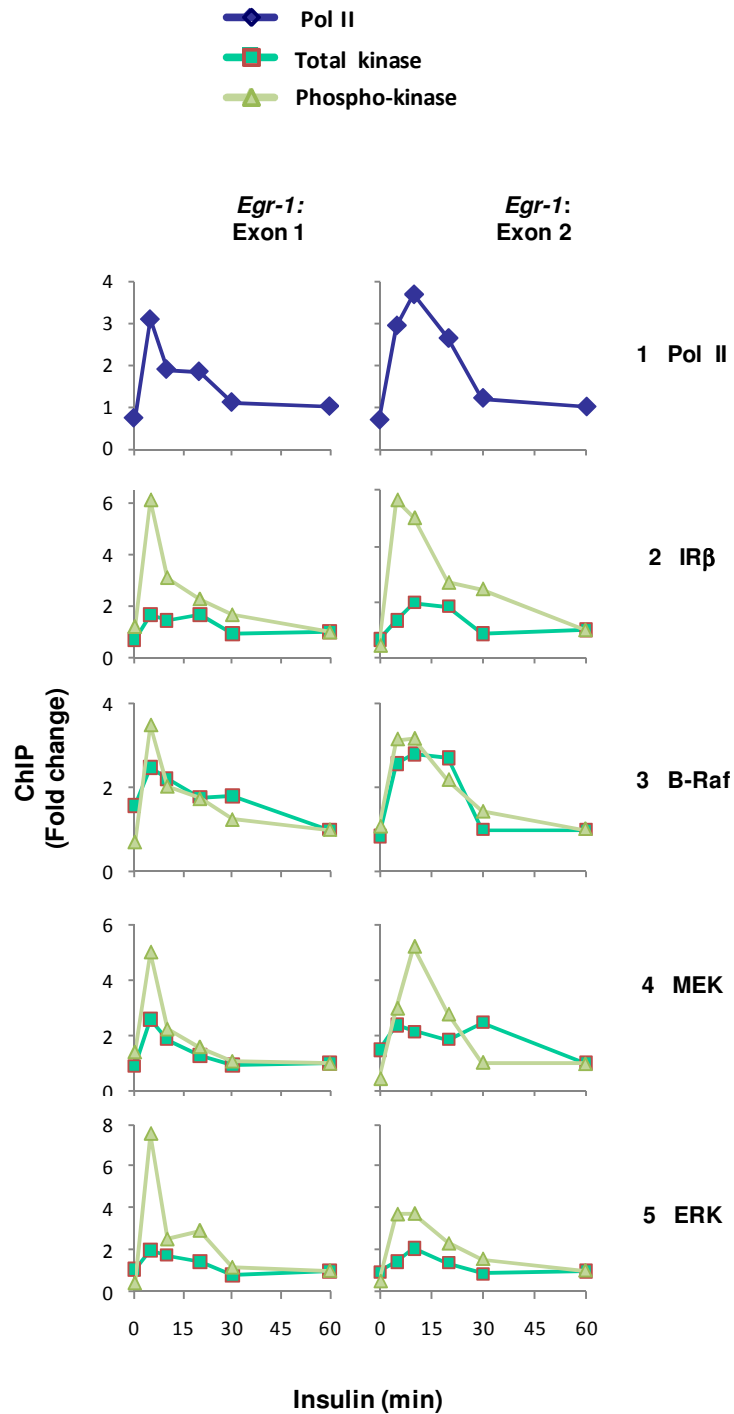

**Supplementary Figure 3 – Specificity of feeding-induced phospho-IR recruitment to the *Gck* locus.** ChIP data from figure 4C using primers for the 1<sup>st</sup> and 2<sup>nd</sup> TSS of *Gck* was compared to that using primers to the *gapdh* TSS.

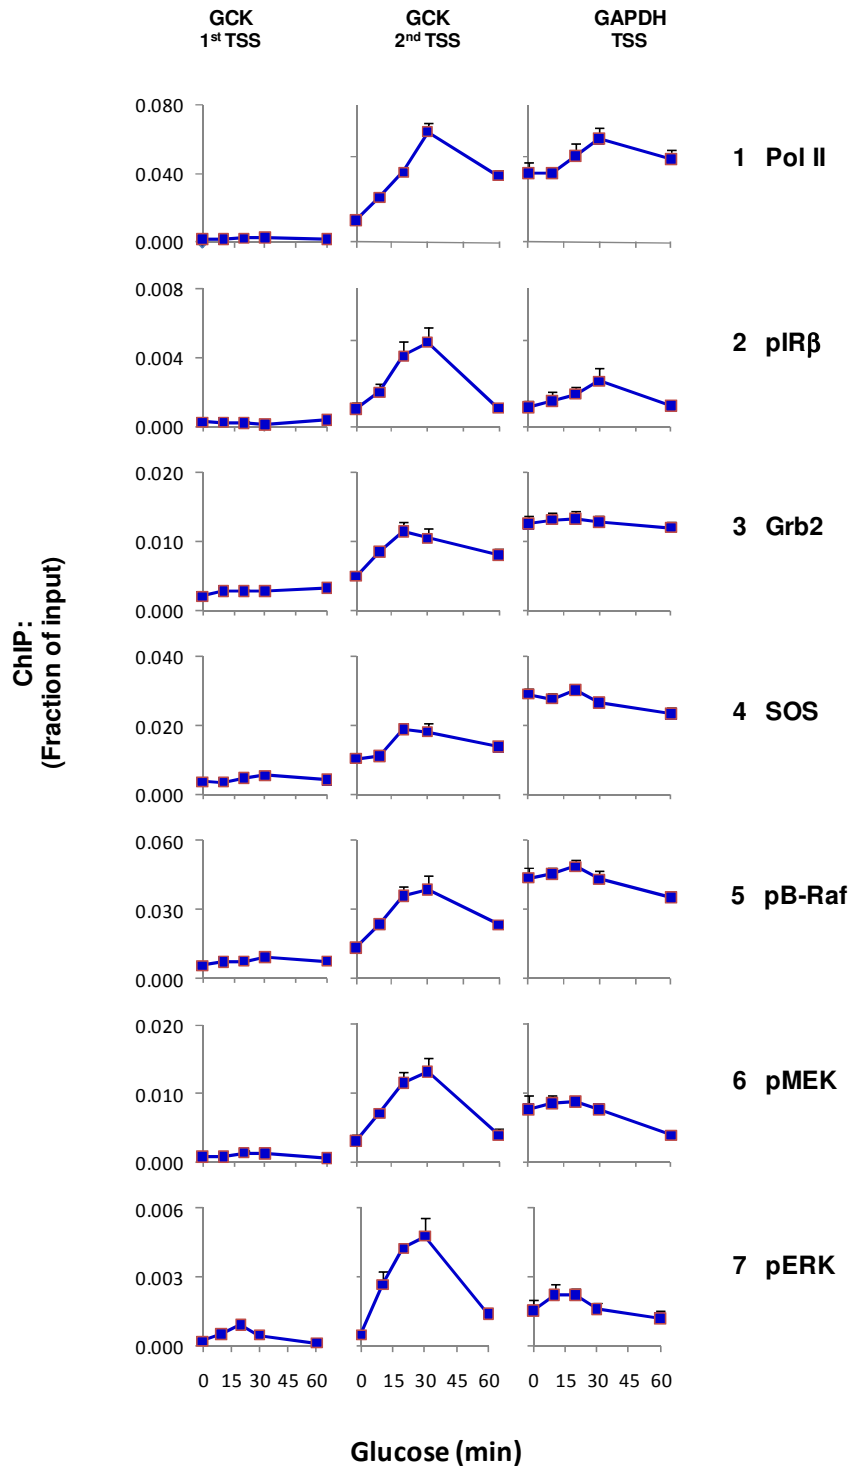

### Supplementary Table 1 – Primers used in real-time PCR

|                                   |     |                        |
|-----------------------------------|-----|------------------------|
| Rat <i>egr-1</i> , -252 bp        | FWD | GCCGGAACAGACCTTATTTG   |
|                                   | REV | GCCTAGTATTGGAACAGCGG   |
| Rat <i>egr-1</i> , +232           | FWD | ACCACCCAACATCAGCTCTC   |
|                                   | REV | AGCAGCATCATCTCCTCCAG   |
| Rat <i>egr-1</i> , +3319 bp       | FWD | GTCTTGGTGCCTTTGTGTGA   |
|                                   | REV | CCTCTTCCTCATCGTGCTCT   |
| Rat <i>egr-1</i> , -5344 bp       | FWD | TCCTCGGGAAGAGAGACAAC   |
|                                   | REV | TACAGTGGACAGATGGCTGG   |
| Mouse $\beta$ -actin (for RT-PCR) | FWD | GCTGCGTTTTACACCCTTTC   |
|                                   | REV | CTGTGCGCCTTCACCGTTC    |
| Mouse <i>Spot-14</i> (for RT-PCR) | FWD | CGAAACGCTATCCCAAGAAC   |
|                                   | REV | AGCTGCACATCCCTCAGAA    |
| Mouse <i>Fasn</i> (for RT-PCR)    | FWD | CCCTGGTGTCTCCTCAGT     |
|                                   | REV | CGACGCCCTCATCTCTGT     |
| Mouse <i>Sdc-1</i> (for RT-PCR)   | FWD | AGGTTTCCAAGCGCAGTTC    |
|                                   | REV | TCAGTTGCTCGCCTCACTT    |
| Mouse <i>Foxo1</i> (for RT-PCR)   | FWD | GTCTCCCGGTACTTCTCTGCT  |
|                                   | REV | GTGGTCGAGTTGGACTGGTT   |
| Mouse <i>egr-1</i> (for RT-PCR)   | FWD | CACCACCCAACATCAGTTCTC  |
|                                   | REV | GCAGCATCATCTCCTCCAGT   |
| Mouse GAPDH TSS                   | FWD | CCCATCACGTCCTCCATC     |
|                                   | REV | TGGGCACTGTACGGGTCT     |
| Mouse Gck upstream TSS            | FWD | GTTTGCATGTCCCCAACAC    |
|                                   | REV | TCCACAGATTGCTACCCACA   |
| Mouse Gck downstream TSS          | FWD | TGCAAACTCAGCCAGACA     |
|                                   | REV | GGGCTCCCCTCCTTGTAGT    |
| Mouse Gck intron 3                | FWD | TTCTATTTCTGGTCTCCCATCT |
|                                   | REV | CATACTTGCCCCTCCTTCCT   |
| Mouse Gck 3' end                  | FWD | GGGGTGGAGGTATATGAAGGA  |
|                                   | REV | CTTGCCTGTGGCTGAAGAG    |
| Mouse L32                         | FWD | TTAAGCGAAACTGGCGGAAAC  |
|                                   | REV | TTGTTGCTCCCATAACCGATG  |

**Supplementary Table 2 - List of antibodies use in ChIP assays**

| Antibody          | Catalog No | Source            | Manufacturer     | Immunogen                                    |
|-------------------|------------|-------------------|------------------|----------------------------------------------|
| Pol II CTD (4H8)  | sc-47701   | mouse monoclonal  | Santa Cruz       | C-terminal domain repeats(CTD)               |
| IRβ               | sc-711     | rabbit polyclonal | Santa Cruz       | C-terminus                                   |
| pIRβ(Y1146)       | 3021       | rabbit polyclonal | Cell Signaling   | pTyr1146                                     |
| pIRβ(Y1146)       | SA-390     | rabbit polyclonal | Enzo             | pTyr1146                                     |
| Grb2              | sc-255     | rabbit polyclonal | Santa Cruz       | C-terminus                                   |
| SOS1&2            | S15530     | rabbit polyclonal | Transduction Lab | mouse Sos1 aa 1–109, mouse Sos2 aa 1095–1297 |
| SOS 1&2 (D21)     | sc-259     | rabbit polyclonal | Santa Cruz       | N-terminus                                   |
| B-Raf (C-19)      | sc-166     | rabbit polyclonal | Santa Cruz       | C-terminus                                   |
| p-B-Raf           | sc-28006r  | rabbit polyclonal | Santa Cruz       | pThr598/pSer601                              |
| Mek1/2            | M17030     | rabbit polyclonal | Transduction Lab |                                              |
| Mek1 +Mek2        | ab70613    | rabbit polyclonal | Abcam            | MEK Ser 218/222 and MEK2 Ser 222/226         |
| pMek1/2(S217/221) | 9121       | rabbit polyclonal | Cell Signaling   | Phospho-MEK1 (pSer217/221)                   |
| ERK1(K-23)        | sc-94      | rabbit polyclonal | Santa Cruz       | subdomain XI                                 |
| pErk1/2           | 9101       | rabbit polyclonal | Cell Signaling   | pThr202/pTyr204                              |
| pErk1/2           | sc-101760  | rabbit polyclonal | Santa Cruz       | pThr202                                      |
| SRF(G-20)         | sc-335     | rabbit polyclonal | Santa Cruz       | C-terminus                                   |
| MKP-1(V-15)       | sc-1199    | rabbit polyclonal | Santa Cruz       | C-terminus                                   |
| Histone H3        | ab1791     | rabbit polyclonal | Abcam            |                                              |
| H3K9,14Ac         | 005-044    | rabbit polyclonal | Diagenode        |                                              |
| H3K79m2           | ab3594     | rabbit polyclonal | Abcam            |                                              |
| H3K27m3           | ab6002     | rabbit polyclonal | Abcam            |                                              |

1. Iwamoto Y, Wong KY, Goldfine ID (1981) Insulin action in cultured HTC and H35 rat hepatoma cells: receptor binding and hormone sensitivity. *Endocrinology* 108: 44-51.
